# Supplementary material
Source: publisher figshare collection journal article supplement (https://acs.figshare.com/ndownloader/files/5190589)
Supplement: Supplementary file 1 [file 5190589]

data_hmhpen_for_Helen_Hoyt_@_-1
#-----------------------------------------------------------------------------
_audit_creation_date                  'Tue Mar 11 16:52:34 2003'
_audit_creation_method                'by teXsan'
_audit_update_record                   ?
#-----------------------------------------------------------------------------
# PROCESSING SUMMARY (IUCr Office Use Only) 
_journal_date_recd_electronic          ?
_journal_date_from_coeditor            ?
_journal_date_accepted                 ?
_journal_coeditor_code                 ?
#-----------------------------------------------------------------------------
# SUBMISSION DETAILS 
_publ_contact_author_name             ' ENTER NAME'
_publ_contact_author_address
;
    ENTER ADDRESS
;
_publ_contact_author_email            ' ENTER EMAIL ADDRESS '
_publ_contact_author_fax              ' ENTER FAX NUMBER '
_publ_contact_author_phone            ' ENTER PHONE NUMBER '
_publ_contact_letter
;
    ENTER TEXT OF LETTER
;
_publ_requested_journal               ' ENTER JOURNAL NAME HERE'
_publ_requested_category              ' CHOOSE FI FM FO CI CM CO or AD'

_publ_requested_coeditor_name          ?
#-----------------------------------------------------------------------------
# TITLE AND AUTHOR LIST 

_publ_section_title
;
    ENTER SECTION TITLE
;

_publ_section_title_footnote
;
    ENTER FOOTNOTE TO TITLE OF PAPER
;
loop_
_publ_author_name
_publ_author_footnote
_publ_author_address
' FIRST AUTHORS NAME '
;
  FIRST AUTHORS FOOTNOTES
;
;
  FIRST AUTHORS ADDRESS
;
_publ_section_synopsis
;
  ENTER SYNOPSIS
;
#-----------------------------------------------------------------------------
# TEXT 

_publ_section_abstract
;
    ENTER ABSTRACT
;

_publ_section_comment
;
The zirconium complex crystallizes as pale yellow tablets from a diethyl ether solution.  There are two molecules in the acentric, monoclinic space group P2$_1$.  The correct enantiomorph of the space group was determined by comparison of the intensities of Friedel pairs of reflections.  The correct geometry is shown in the Figures.
  
As expected, the zirconium is coordinated by a $t$-butyl amide, a pentyl ligand and the chelating Cp moiety.  The Cp moiety carbon atoms were refined with isotropic thermal parameters.  Anisotropic refinement of these carbons led to several of them having non-positive definite thermal displacement parameters.  Attempts at improving the absorption correction of the data did not remedy this problem.

The bond lengths and angles within the moleucle are apparently normal.
 
;

_publ_section_acknowledgements
;
    ENTER ACKNOWLEDGEMENTS
;

_publ_section_references
;
    ENTER OTHER REFERENCES
SIR97: Altomare, A., Burla, M. C., Camalli, M., Cascarano, G., Giacovazzo, C., Guagliardi, A., Moliterni, A. G. G., Polidori, G., & Spagna, R. 
SIR97: A new tool for crystal structure determination and refinement. J. App. Cryst. (1998) 

SMART v5.052d: Area-Detector Software Package, 
Bruker Analytical X-ray Systems, Inc.: Madison, WI, (1995-99)

SAINT: SAX Area-Dectector Integration Program, V5.04; 
Siemens Industrial Automation, Inc.: Madison, WI, (1995)

teXsan: Crystal Structure Analysis Package, Molecular Structure Corporation,
(1985 & 1992). 

;

_publ_section_figure_captions
;
    ENTER FIGURE CAPTIONS
;

_publ_section_exptl_prep
;
    ENTER COMPOUND PREPARATION DETAILS
;

_publ_section_exptl_refinement
;
    ENTER SPECIAL DETAILS OF THE REFINEMENT
;
#-----------------------------------------------------------------------------
# CHEMICAL DATA 
_chemical_formula_sum                  'C29 H45 N Zr '
_chemical_formula_moiety               'C29 H45 N Zr '
_chemical_formula_weight               498.90
_chemical_melting_point                ?
#-----------------------------------------------------------------------------
# CRYSTAL DATA 
_symmetry_cell_setting                 monoclinic
_symmetry_space_group_name_H-M        'P 21       '
_symmetry_Int_Tables_number            4
loop_
_symmetry_equiv_pos_as_xyz
x,y,z
-x,1/2+y,-z
_cell_length_a                         10.627(1)
_cell_length_b                         12.109(1)
_cell_length_c                         10.746(1)
_cell_angle_alpha                      90
_cell_angle_beta                       113.193(1)
_cell_angle_gamma                      90
_cell_volume                           1271.2(2)
_cell_formula_units_Z                  2
_cell_measurement_reflns_used          2527
_cell_measurement_theta_min            2.7
_cell_measurement_theta_max            23.4
_cell_measurement_temperature          118.2
#-----------------------------------------------------------------------------
_exptl_crystal_description            'tablet'
_exptl_crystal_colour                 'yellow'
_exptl_crystal_size_max                0.150
_exptl_crystal_size_mid                0.150
_exptl_crystal_size_min                0.110
_exptl_crystal_size_rad                ?
_exptl_crystal_density_diffrn          1.303
_exptl_crystal_density_meas            ?
_exptl_crystal_density_method         'not measured'
_exptl_crystal_F_000                   532.00
_exptl_absorpt_coefficient_mu          0.448
_exptl_absorpt_correction_type         empirical
_exptl_absorpt_process_details        'Blessing, 1995'
_exptl_absorpt_correction_T_min        0.571
_exptl_absorpt_correction_T_max        0.952
#-----------------------------------------------------------------------------
# EXPERIMENTAL DATA 
_diffrn_radiation_type                'Mo K\a'
_diffrn_radiation_wavelength           0.7107
_diffrn_measurement_device_type       'SMART CCD'
_diffrn_measurement_method             \w-scan
_diffrn_ambient_temperature            118.2
_diffrn_reflns_number                  2227
_diffrn_reflns_av_R_equivalents        0.049
_diffrn_reflns_theta_min               2.06
_diffrn_reflns_theta_max               24.80
_diffrn_measured_fraction_theta_max    0.9635
_diffrn_reflns_theta_full              24.80
_diffrn_measured_fraction_theta_full   0.9635
_diffrn_reflns_limit_h_min             0
_diffrn_reflns_limit_h_max             12
_diffrn_reflns_limit_k_min             0
_diffrn_reflns_limit_k_max             14
_diffrn_reflns_limit_l_min             -12
_diffrn_reflns_limit_l_max             11
_diffrn_standards_number               ?
_diffrn_standards_interval_count       ?
_diffrn_standards_decay_%              ?
#-----------------------------------------------------------------------------
# REFINEMENT DATA 
_refine_special_details
;
Refinement using reflections with F^2^ > 2.5 sigma(F^2^). The weighted R-factor
(wR), goodness of fit (S) and R-factor (gt) are based on F, with F set to zero 
for negative F. The threshold expression of F^2^ > 2.0 sigma(F^2^) is used only 
for calculating R-factor (gt).
;
_atom_sites_solution_primary           direct
_reflns_number_total                   2221
_reflns_number_gt                      1943
_reflns_threshold_expression           F^2^>2.0\s(F^2^)
_refine_ls_structure_factor_coef       F
_refine_ls_R_factor_gt                 0.0609
_refine_ls_wR_factor_gt                0.0750
_refine_ls_R_factor_all                0.0717
_refine_ls_wR_factor_ref               0.0764
_refine_ls_hydrogen_treatment          noref
_refine_ls_matrix_type                 full
_refine_ls_number_reflns               1943
_refine_ls_number_parameters           179
_refine_ls_number_restraints           0
_refine_ls_goodness_of_fit_ref         2.230
_refine_ls_weighting_scheme            calc
_refine_ls_weighting_details
   'w = 1/[\s^2^(Fo) + 0.00022|Fo|^2^]'
_refine_ls_shift/su_max                0.0142
_refine_diff_density_max               0.72
_refine_diff_density_min               -1.18
_refine_ls_extinction_method           none
_refine_ls_extinction_coef             ?
_refine_ls_abs_structure_details       ?
_refine_ls_abs_structure_Flack         ?
#-----------------------------------------------------------------------------
# COMPUTATION AND REFINEMENT PROGRAMS 
_computing_data_collection            'Bruker SMART v5.0'
_computing_cell_refinement            'Bruker SAINT v5.04'
_computing_data_reduction             'Bruker SAINT v5.04'
_computing_structure_solution          'SIR97'
_computing_structure_refinement       'teXsan'
_computing_publication_material       'teXsan'
_computing_molecular_graphics          ?
#-----------------------------------------------------------------------------
loop_
_atom_type_symbol
_atom_type_description
_atom_type_scat_dispersion_real
_atom_type_scat_dispersion_imag
_atom_type_scat_source
  'Zr' 'Zr'  -2.967 0.560 
;International Tables for Crystallography
(1992, Vol. C, Tables 4.2.6.8 and 6.1.1.1)
;
  'N' 'N'  0.006 0.003 
;International Tables for Crystallography
(1992, Vol. C, Tables 4.2.6.8 and 6.1.1.1)
;
  'C' 'C'  0.003 0.002 
;International Tables for Crystallography
(1992, Vol. C, Tables 4.2.6.8 and 6.1.1.1)
;
  'H' 'H'  0.000 0.000 
;International Tables for Crystallography
(1992, Vol. C, Table 6.1.1.2)
;
#-----------------------------------------------------------------------------
# ATOMIC COORDINATES AND DISPLACEMENT PARAMETERS 
loop_ 
_atom_site_label 
_atom_site_type_symbol 
_atom_site_fract_x 
_atom_site_fract_y 
_atom_site_fract_z 
_atom_site_U_iso_or_equiv 
_atom_site_adp_type 
_atom_site_occupancy 
_atom_site_calc_flag 
_atom_site_refinement_flags 
_atom_site_disorder_assembly 
_atom_site_disorder_group 
 Zr1    Zr 0.29967(9)  0.1332      0.58986(9)  0.0161(2)   Uani 1.00 d . . .
 N1     N  0.4002(10)  0.0675(8)   0.7773(9)   0.023(3)    Uani 1.00 d . . .
 C1     C  0.395(1)    -0.0156(9)  0.879(1)    0.019(3)    Uani 1.00 d . . .
 C2     C  0.498(1)    0.021(1)    1.024(1)    0.036(4)    Uani 1.00 d . . .
 C3     C  0.445(1)    -0.128(1)   0.848(1)    0.032(4)    Uani 1.00 d . . .
 C4     C  0.254(1)    -0.0212(10) 0.878(1)    0.026(4)    Uani 1.00 d . . .
 C5     C  0.146(1)    0.2238(10)  0.652(1)    0.024(3)    Uani 1.00 d . . .
 C6     C  0.194(1)    0.2889(9)   0.787(1)    0.021(3)    Uani 1.00 d . . .
 C7     C  0.080(1)    0.3176(9)   0.837(1)    0.025(3)    Uani 1.00 d . . .
 C8     C  0.132(1)    0.374(1)    0.974(1)    0.023(3)    Uani 1.00 d . . .
 C9     C  0.016(2)    0.407(1)    1.019(1)    0.033(5)    Uani 1.00 d . . .
 C10    C  0.342(1)    0.3089(10)  0.492(1)    0.023(3)    Uiso 1.00 d . . .
 C11    C  0.411(1)    0.3245(10)  0.626(1)    0.023(3)    Uiso 1.00 d . . .
 C12    C  0.521(1)    0.2524(9)   0.670(1)    0.021(3)    Uiso 1.00 d . . .
 C13    C  0.640(1)    0.2473(10)  0.806(1)    0.024(3)    Uiso 1.00 d . . .
 C14    C  0.737(1)    0.150(1)    0.818(1)    0.029(3)    Uiso 1.00 d . . .
 C15    C  0.7613(10)  0.136(2)    0.6868(10)  0.032(2)    Uiso 1.00 d . . .
 C16    C  0.625(1)    0.1095(9)   0.565(1)    0.028(3)    Uiso 1.00 d . . .
 C17    C  0.521(1)    0.1910(9)   0.561(1)    0.018(2)    Uiso 1.00 d . . .
 C18    C  0.406(1)    0.2274(9)   0.442(1)    0.019(3)    Uiso 1.00 d . . .
 C19    C  0.276(1)    -0.0473(10) 0.468(1)    0.021(3)    Uiso 1.00 d . . .
 C20    C  0.169(1)    -0.0466(9)  0.519(1)    0.021(3)    Uiso 1.00 d . . .
 C21    C  0.070(1)    0.0279(10)  0.446(1)    0.025(3)    Uiso 1.00 d . . .
 C22    C  -0.071(1)   0.048(1)    0.442(1)    0.030(3)    Uiso 1.00 d . . .
 C23    C  -0.144(1)   0.136(2)    0.351(1)    0.049(3)    Uiso 1.00 d . . .
 C24    C  -0.119(1)   0.148(2)    0.226(1)    0.050(4)    Uiso 1.00 d . . .
 C25    C  0.026(1)    0.1660(9)   0.246(1)    0.025(3)    Uiso 1.00 d . . .
 C26    C  0.117(1)    0.0802(9)   0.351(1)    0.018(3)    Uiso 1.00 d . . .
 C27    C  0.243(1)    0.0321(9)   0.367(1)    0.019(3)    Uiso 1.00 d . . .
 C28    C  0.365(1)    0.185(1)    0.296(1)    0.032(4)    Uiso 1.00 d . . .
 C29    C  0.329(1)    0.064(1)    0.290(1)    0.026(3)    Uiso 1.00 d . . .
 C100   C  0.4407      0.2606      0.5586      0.0025      Uiso 0.00 d P . .
 C101   C  0.1749      0.0087      0.4303      0.0025      Uiso 0.00 d P . .
 H1     H  0.4727      0.0922      1.0438      0.0419      Uiso 1.00 calc . . .
 H2     H  0.4954      -0.0305     1.0889      0.0419      Uiso 1.00 calc . . .
 H3     H  0.5879      0.0244      1.0251      0.0419      Uiso 1.00 calc . . .
 H4     H  0.5360      -0.1200     0.8527      0.0365      Uiso 1.00 calc . . .
 H5     H  0.4438      -0.1808     0.9124      0.0365      Uiso 1.00 calc . . .
 H6     H  0.3867      -0.1510     0.7597      0.0365      Uiso 1.00 calc . . .
 H7     H  0.1913      -0.0419     0.7906      0.0292      Uiso 1.00 calc . . .
 H8     H  0.2528      -0.0747     0.9424      0.0292      Uiso 1.00 calc . . .
 H9     H  0.2299      0.0489      0.9013      0.0292      Uiso 1.00 calc . . .
 H10    H  0.1002      0.2757      0.5827      0.0283      Uiso 1.00 calc . . .
 H11    H  0.0825      0.1704      0.6565      0.0283      Uiso 1.00 calc . . .
 H12    H  0.2605      0.2455      0.8552      0.0237      Uiso 1.00 calc . . .
 H13    H  0.2345      0.3559      0.7757      0.0237      Uiso 1.00 calc . . .
 H14    H  0.0168      0.3658      0.7724      0.0290      Uiso 1.00 calc . . .
 H15    H  0.0348      0.2515      0.8423      0.0290      Uiso 1.00 calc . . .
 H16    H  0.1922      0.3245      1.0395      0.0268      Uiso 1.00 calc . . .
 H17    H  0.1813      0.4384      0.9700      0.0268      Uiso 1.00 calc . . .
 H18    H  -0.0317     0.3428      1.0230      0.0368      Uiso 1.00 calc . . .
 H19    H  0.0562      0.4408      1.1048      0.0368      Uiso 1.00 calc . . .
 H20    H  -0.0417     0.4571      0.9545      0.0368      Uiso 1.00 calc . . .
 H21    H  0.2718      0.3566      0.4364      0.0271      Uiso 1.00 calc . . .
 H22    H  0.3959      0.3826      0.6774      0.0274      Uiso 1.00 calc . . .
 H23    H  0.6898      0.3144      0.8190      0.0286      Uiso 1.00 calc . . .
 H24    H  0.6047      0.2399      0.8742      0.0286      Uiso 1.00 calc . . .
 H25    H  0.8225      0.1644      0.8906      0.0340      Uiso 1.00 calc . . .
 H26    H  0.6985      0.0846      0.8353      0.0340      Uiso 1.00 calc . . .
 H27    H  0.7989      0.2020      0.6686      0.0382      Uiso 1.00 calc . . .
 H28    H  0.8238      0.0768      0.6984      0.0382      Uiso 1.00 calc . . .
 H29    H  0.6397      0.1132      0.4829      0.0326      Uiso 1.00 calc . . .
 H30    H  0.5951      0.0374      0.5746      0.0326      Uiso 1.00 calc . . .
 H31    H  0.3451      -0.1017     0.4865      0.0248      Uiso 1.00 calc . . .
 H32    H  0.1592      -0.0998     0.5800      0.0257      Uiso 1.00 calc . . .
 H33    H  -0.1230     -0.0182     0.4127      0.0368      Uiso 1.00 calc . . .
 H34    H  -0.0639     0.0664      0.5298      0.0368      Uiso 1.00 calc . . .
 H35    H  -0.2391     0.1230      0.3249      0.0591      Uiso 1.00 calc . . .
 H36    H  -0.1188     0.2030      0.3990      0.0591      Uiso 1.00 calc . . .
 H37    H  -0.1500     0.0820      0.1735      0.0601      Uiso 1.00 calc . . .
 H38    H  -0.1716     0.2085      0.1761      0.0601      Uiso 1.00 calc . . .
 H39    H  0.0353      0.1567      0.1621      0.0302      Uiso 1.00 calc . . .
 H40    H  0.0523      0.2387      0.2785      0.0302      Uiso 1.00 calc . . .
 H41    H  0.2882      0.2255      0.2360      0.0394      Uiso 1.00 calc . . .
 H42    H  0.4396      0.1949      0.2688      0.0394      Uiso 1.00 calc . . .
 H43    H  0.4125      0.0241      0.3255      0.0307      Uiso 1.00 calc . . .
 H44    H  0.2806      0.0454      0.1974      0.0307      Uiso 1.00 calc . . .
 H45    H  0.4855      0.1047      0.8167      0.0279      Uiso 1.00 calc . . .

loop_ 
_atom_site_aniso_label 
_atom_site_aniso_U_11 
_atom_site_aniso_U_22 
_atom_site_aniso_U_33 
_atom_site_aniso_U_12 
_atom_site_aniso_U_13 
_atom_site_aniso_U_23 
 Zr1    0.0226(5)   0.0103(4)   0.0168(5)   -0.0025(8)  0.0093(4)   -0.0005(8) 
 N1     0.029(6)    0.023(5)    0.026(6)    -0.010(4)   0.020(5)    0.002(5)   
 C1     0.024(7)    0.017(6)    0.013(6)    0.008(5)    0.005(5)    0.002(5)   
 C2     0.046(9)    0.033(8)    0.022(7)    -0.001(7)   0.007(6)    0.005(6)   
 C3     0.046(8)    0.021(7)    0.031(7)    0.011(6)    0.019(6)    0.000(6)   
 C4     0.033(8)    0.016(6)    0.034(8)    -0.004(6)   0.017(7)    0.002(6)   
 C5     0.019(6)    0.026(7)    0.019(6)    -0.012(5)   -0.003(5)   0.001(6)   
 C6     0.027(7)    0.016(6)    0.023(7)    0.003(5)    0.012(6)    0.000(6)   
 C7     0.024(7)    0.017(6)    0.026(7)    0.001(5)    0.004(6)    0.002(5)   
 C8     0.025(7)    0.030(7)    0.018(6)    0.006(5)    0.010(5)    -0.001(5)  
 C9     0.052(10)   0.021(10)   0.030(9)    0.012(7)    0.021(8)    -0.004(7)  
 
_geom_special_details
;
 ?
;
loop_ 
_geom_bond_atom_site_label_1 
_geom_bond_atom_site_label_2 
_geom_bond_distance 
_geom_bond_site_symmetry_1 
_geom_bond_site_symmetry_2 
_geom_bond_publ_flag 
 ZR1       N1        2.034(10)  . . yes  
 ZR1       C5        2.28(1)    . . yes  
 ZR1       C10       2.49(1)    . . yes  
 ZR1       C11       2.56(1)    . . yes  
 ZR1       C12       2.60(1)    . . yes  
 ZR1       C17       2.59(1)    . . yes  
 ZR1       C18       2.55(1)    . . yes  
 ZR1       C19       2.51(1)    . . yes  
 ZR1       C20       2.53(1)    . . yes  
 ZR1       C21       2.65(1)    . . yes  
 ZR1       C26       2.62(1)    . . yes  
 ZR1       C27       2.55(1)    . . yes  
 ZR1       C100      2.2663(6)  . . yes  
 ZR1       C101      2.2759(7)  . . yes  
 N1        C1        1.50(1)    . . yes  
 C1        C2        1.57(2)    . . yes  
 C1        C3        1.54(2)    . . yes  
 C1        C4        1.49(2)    . . yes  
 C5        C6        1.54(2)    . . yes  
 C6        C7        1.54(2)    . . yes  
 C7        C8        1.52(2)    . . yes  
 C8        C9        1.54(2)    . . yes  
 C10       C11       1.34(2)    . . yes  
 C10       C18       1.41(2)    . . yes  
 C11       C12       1.38(2)    . . yes  
 C12       C13       1.51(2)    . . yes  
 C12       C17       1.39(2)    . . yes  
 C13       C14       1.54(2)    . . yes  
 C14       C15       1.54(1)    . . yes  
 C15       C16       1.55(1)    . . yes  
 C16       C17       1.47(1)    . . yes  
 C17       C18       1.45(1)    . . yes  
 C18       C28       1.55(2)    . . yes  
 C19       C20       1.45(2)    . . yes  
 C19       C27       1.39(2)    . . yes  
 C20       C21       1.37(2)    . . yes  
 C21       C22       1.50(2)    . . yes  
 C21       C26       1.45(2)    . . yes  
 C22       C23       1.45(2)    . . yes  
 C23       C24       1.48(2)    . . yes  
 C24       C25       1.48(2)    . . yes  
 C25       C26       1.56(2)    . . yes  
 C26       C27       1.40(1)    . . yes  
 C27       C29       1.51(2)    . . yes  
 C29       1         0(1)       . 2_1.5 yes  
 
loop_ 
_geom_angle_atom_site_label_1 
_geom_angle_atom_site_label_2 
_geom_angle_atom_site_label_3 
_geom_angle 
_geom_angle_site_symmetry_1 
_geom_angle_site_symmetry_2 
_geom_angle_site_symmetry_3 
_geom_angle_publ_flag 
 N1        ZR1       C5        93.1(4)    . . . ? 
 N1        ZR1       C100      107.0(2)   . . . ? 
 N1        ZR1       C101      114.2(3)   . . . ? 
 C5        ZR1       C100      108.0(3)   . . . ? 
 C5        ZR1       C101      105.6(3)   . . . ? 
 ZR1       N1        C1        145.9(7)   . . . ? 
 N1        C1        C2        108.5(9)   . . . ? 
 N1        C1        C3        108.6(9)   . . . ? 
 N1        C1        C4        110.3(9)   . . . ? 
 C2        C1        C3        107.4(9)   . . . ? 
 C2        C1        C4        109.0(9)   . . . ? 
 C3        C1        C4        112.8(10)  . . . ? 
 ZR1       C5        C6        120.8(7)   . . . ? 
 C5        C6        C7        115.4(9)   . . . ? 
 C6        C7        C8        114.0(9)   . . . ? 
 C7        C8        C9        112.9(9)   . . . ? 
 C11       C10       C18       111(1)     . . . ? 
 C10       C11       C12       108(1)     . . . ? 
 C11       C12       C13       129(1)     . . . ? 
 C11       C12       C17       109.3(10)  . . . ? 
 C13       C12       C17       120.9(10)  . . . ? 
 C12       C13       C14       113.0(9)   . . . ? 
 C13       C14       C15       111(1)     . . . ? 
 C14       C15       C16       111.3(8)   . . . ? 
 C15       C16       C17       108(1)     . . . ? 
 C12       C17       C16       126.1(10)  . . . ? 
 C12       C17       C18       107.2(10)  . . . ? 
 C16       C17       C18       126.6(10)  . . . ? 
 C10       C18       C17       104.2(9)   . . . ? 
 C10       C18       C28       129(1)     . . . ? 
 C17       C18       C28       126(1)     . . . ? 
 C20       C19       C27       107.6(10)  . . . ? 
 C19       C20       C21       109.1(10)  . . . ? 
 C20       C21       C22       130(1)     . . . ? 
 C20       C21       C26       106.6(10)  . . . ? 
 C22       C21       C26       121(1)     . . . ? 
 C21       C22       C23       113(1)     . . . ? 
 C22       C23       C24       116(1)     . . . ? 
 C23       C24       C25       115(1)     . . . ? 
 C24       C25       C26       108.6(10)  . . . ? 
 C21       C26       C25       120.6(9)   . . . ? 
 C21       C26       C27       108.3(10)  . . . ? 
 C25       C26       C27       130.8(10)  . . . ? 
 C19       C27       C26       108.4(9)   . . . ? 
 C19       C27       C29       126(1)     . . . ? 
 C26       C27       C29       125(1)     . . . ? 
 C18       C28       C29       109(1)     . . . ? 
 C27       C29       C28       115(1)     . . . ? 
 ZR1       C100      C10       86.8(6)    . . . ? 
 ZR1       C100      C11       90.3(5)    . . . ? 
 ZR1       C100      C12       92.7(5)    . . . ? 
 ZR1       C100      C17       91.6(5)    . . . ? 
 ZR1       C100      C18       88.5(5)    . . . ? 
 ZR1       C101      C19       86.7(6)    . . . ? 
 ZR1       C101      C20       88.2(5)    . . . ? 
 ZR1       C101      C21       93.6(6)    . . . ? 
 ZR1       C101      C26       92.3(5)    . . . ? 
 ZR1       C101      C27       88.3(5)    . . . ? 
 
loop_ 
_geom_torsion_atom_site_label_1 
_geom_torsion_atom_site_label_2 
_geom_torsion_atom_site_label_3 
_geom_torsion_atom_site_label_4 
_geom_torsion
_geom_torsion_site_symmetry_1 
_geom_torsion_site_symmetry_2 
_geom_torsion_site_symmetry_3 
_geom_torsion_site_symmetry_4 
_geom_torsion_publ_flag
 ZR1       N1        C1        C2        -158(1)    . . . . ? 
 ZR1       N1        C1        C3        85(1)      . . . . ? 
 ZR1       N1        C1        C4        -38(1)     . . . . ? 
 ZR1       C5        C6        C7        -163.2(8)  . . . . ? 
 ZR1       C100      C10       C11       91.5(6)    . . . . ? 
 ZR1       C100      C10       C18       -89.4(6)   . . . . ? 
 ZR1       C100      C11       C10       -86.5(6)   . . . . ? 
 ZR1       C100      C11       C12       92.7(6)    . . . . ? 
 ZR1       C100      C12       C11       -89.5(6)   . . . . ? 
 ZR1       C100      C12       C13       153(7)     . . . . ? 
 ZR1       C100      C12       C17       90.8(6)    . . . . ? 
 ZR1       C100      C17       C12       -92.3(6)   . . . . ? 
 ZR1       C100      C17       C16       -164(21)   . . . . ? 
 ZR1       C100      C17       C18       88.0(6)    . . . . ? 
 ZR1       C100      C18       C10       87.1(6)    . . . . ? 
 ZR1       C100      C18       C17       -92.1(6)   . . . . ? 
 ZR1       C100      C18       C28       -124(39)   . . . . ? 
 ZR1       C101      C19       C20       89.0(6)    . . . . ? 
 ZR1       C101      C19       C27       -89.4(6)   . . . . ? 
 ZR1       C101      C20       C19       -87.1(6)   . . . . ? 
 ZR1       C101      C20       C21       94.6(6)    . . . . ? 
 ZR1       C101      C21       C20       -86.7(6)   . . . . ? 
 ZR1       C101      C21       C22       146(6)     . . . . ? 
 ZR1       C101      C21       C26       91.3(6)    . . . . ? 
 ZR1       C101      C26       C21       -93.1(6)   . . . . ? 
 ZR1       C101      C26       C25       -129(8)    . . . . ? 
 ZR1       C101      C26       C27       87.4(6)    . . . . ? 
 ZR1       C101      C27       C19       87.1(6)    . . . . ? 
 ZR1       C101      C27       C26       -93.0(6)   . . . . ? 
 ZR1       C101      C27       C29       -16(35)    . . . . ? 
 N1        ZR1       C5        C6        45.1(9)    . . . . ? 
 C1        N1        ZR1       C5        72(1)      . . . . ? 
 C1        N1        ZR1       C100      -177(1)    . . . . ? 
 C1        N1        ZR1       C101      -36(1)     . . . . ? 
 C5        C6        C7        C8        175.7(10)  . . . . ? 
 C6        C5        ZR1       C100      -63.9(9)   . . . . ? 
 C6        C5        ZR1       C101      161.3(8)   . . . . ? 
 C6        C7        C8        C9        177(1)     . . . . ? 
 C10       C11       C12       C13       170(1)     . . . . ? 
 C10       C11       C12       C17       0(1)       . . . . ? 
 C10       C18       C17       C12       0(1)       . . . . ? 
 C10       C18       C17       C16       -177(1)    . . . . ? 
 C10       C18       C28       C29       -117(1)    . . . . ? 
 C11       C10       C18       C17       1(1)       . . . . ? 
 C11       C10       C18       C28       -178(1)    . . . . ? 
 C11       C12       C13       C14       177(1)     . . . . ? 
 C11       C12       C17       C16       176(1)     . . . . ? 
 C11       C12       C17       C18       0(1)       . . . . ? 
 C12       C11       C10       C18       -1(1)      . . . . ? 
 C12       C13       C14       C15       41(1)      . . . . ? 
 C12       C17       C16       C15       -23(1)     . . . . ? 
 C12       C17       C18       C28       178(1)     . . . . ? 
 C13       C12       C17       C16       5(1)       . . . . ? 
 C13       C12       C17       C18       -170.9(10) . . . . ? 
 C13       C14       C15       C16       -61(1)     . . . . ? 
 C14       C13       C12       C17       -14(1)     . . . . ? 
 C14       C15       C16       C17       50(1)      . . . . ? 
 C15       C16       C17       C18       152(1)     . . . . ? 
 C16       C17       C18       C28       2(1)       . . . . ? 
 C17       C18       C28       C29       63(1)      . . . . ? 
 C18       C28       C29       C27       42(1)      . . . . ? 
 C19       C20       C21       C22       168(1)     . . . . ? 
 C19       C20       C21       C26       -3(1)      . . . . ? 
 C19       C27       C26       C21       0(1)       . . . . ? 
 C19       C27       C26       C25       -174(1)    . . . . ? 
 C20       C19       C27       C26       -1(1)      . . . . ? 
 C20       C19       C27       C29       176(1)     . . . . ? 
 C20       C21       C22       C23       179(1)     . . . . ? 
 C20       C21       C26       C25       176.8(9)   . . . . ? 
 C20       C21       C26       C27       2(1)       . . . . ? 
 C21       C20       C19       C27       2(1)       . . . . ? 
 C21       C22       C23       C24       35(2)      . . . . ? 
 C21       C26       C25       C24       -22(1)     . . . . ? 
 C21       C26       C27       C29       -178(1)    . . . . ? 
 C22       C21       C26       C25       4(1)       . . . . ? 
 C22       C21       C26       C27       -170(1)    . . . . ? 
 C22       C23       C24       C25       -58(2)     . . . . ? 
 C23       C22       C21       C26       -9(1)      . . . . ? 
 C23       C24       C25       C26       47(1)      . . . . ? 
 C24       C25       C26       C27       151(1)     . . . . ? 
 C25       C26       C27       C29       7(1)       . . . . ? 
 C26       C27       C29       C28       54(1)      . . . . ? 
 
loop_
_geom_contact_atom_site_label_1 
_geom_contact_atom_site_label_2 
_geom_contact_distance 
_geom_contact_site_symmetry_1 
_geom_contact_site_symmetry_2 
_geom_contact_publ_flag 
 ZR1       C11       2.56(1)    . . ? 
 ZR1       C12       2.60(1)    . . ? 
 ZR1       C17       2.59(1)    . . ? 
 ZR1       C18       2.55(1)    . . ? 
 ZR1       C19       2.51(1)    . . ? 
 ZR1       C20       2.53(1)    . . ? 
 ZR1       C21       2.65(1)    . . ? 
 ZR1       C26       2.62(1)    . . ? 
 ZR1       C27       2.55(1)    . . ? 
 C4        C9        3.57(2)    . 2_547 ? 
 
